# Supplementary material for: Coordinating the interaction of ZnO and ZrO2 for an efficient ethanol-to-butadiene process
Source: Royal Society of Chemistry journal article supplement (doi:10.1039/d3cy01242e), 2024-01-01
Supplement: d3cy01242e1.pdf [file d3cy01242e1.pdf]

## Supplementary Information

### **Coordinating the interaction of ZnO and ZrO<sub>2</sub> for an efficient ethanol-to-butadiene process**

Peng Wang<sup>a</sup>, Shaowen Hou<sup>a</sup>, Pengxiang Tu<sup>a</sup>, Bing Xue<sup>a</sup>, Weixin Guan<sup>a</sup>, Dong Wang<sup>a</sup>,  
Danfeng Zhou<sup>a</sup>, Yajun He<sup>a</sup>, Xinhui Chen<sup>a</sup>, Yixing Wang<sup>a</sup>, Kegong Fang<sup>b</sup>, Xiaonian  
Li<sup>a</sup> and Jun Ni<sup>a\*</sup>

<sup>a</sup> State Key Laboratory of Green Chemistry Synthesis Technology, Institute of Industrial Catalysis, College of Chemical Engineering, Zhejiang University of Technology, Hangzhou, China

<sup>b</sup> State Key Laboratory of Coal Conversion, Institute of Coal Chemistry, Chinese Academy of Sciences, Taiyuan, China

\* Corresponding author and E-mail address: junni@zjut.edu.cn

### Table of Contents

|                                                                                                                   |    |
|-------------------------------------------------------------------------------------------------------------------|----|
| <b>Table S1.</b> Catalytic performance of catalysts reported in the literature.....                               | 4  |
| <b>Figure S1.</b> N <sub>2</sub> adsorption-desorption of the SBA-15 support and xZn-yZr/SBA-15 catalysts.....    | 5  |
| <b>Table S2.</b> Textural properties of the SBA-15 support and xZn-yZr/SBA-15 catalysts. ....                     | 5  |
| <b>Figure S2.</b> Zoom in of the region of 28-40° of Figure 1A.....                                               | 6  |
| <b>Figure S3.</b> FTIR spectra of xZn-yZr/SBA-15 catalysts.....                                                   | 6  |
| <b>Figure S4.</b> Element maps of 5Zn-3Zr/SBA-15 catalyst.....                                                    | 7  |
| <b>Figure S5.</b> EDS line scan of 5Zn-3Zr/SBA-15 catalyst.....                                                   | 7  |
| <b>Table S3.</b> Acid-base properties of xZn-yZr/SBA-15 catalysts with various contents of ZrO <sub>2</sub> ..... | 8  |
| <b>Table S4.</b> Acid-base properties of xZn-yZr/SBA-15 catalysts with various contents of ZnO. ....              | 8  |
| <b>Figure S6.</b> Deconvolution of NH <sub>3</sub> -TPD profile of 5Zn/SBA-15 catalyst.....                       | 9  |
| <b>Figure S7.</b> Deconvolution of NH <sub>3</sub> -TPD profile of 5Zn-1Zr/SBA-15 catalyst.....                   | 9  |
| <b>Figure S8.</b> Deconvolution of NH <sub>3</sub> -TPD profile of 5Zn-2Zr/SBA-15 catalyst.....                   | 10 |
| <b>Figure S9.</b> Deconvolution of NH <sub>3</sub> -TPD profile of 5Zn-3Zr/SBA-15 catalyst.....                   | 10 |

|                                                                                                                                 |    |
|---------------------------------------------------------------------------------------------------------------------------------|----|
| <b>Figure S10.</b> Deconvolution of NH <sub>3</sub> -TPD profile of 5Zn-4Zr/SBA-15 catalyst.....                                | 11 |
| <b>Figure S11.</b> Deconvolution of NH <sub>3</sub> -TPD profile of 5Zn-5Zr/SBA-15 catalyst.....                                | 11 |
| <b>Figure S12.</b> Deconvolution of NH <sub>3</sub> -TPD profile of 3Zr/SBA-15 catalyst. ....                                   | 12 |
| <b>Figure S13.</b> Deconvolution of NH <sub>3</sub> -TPD profile of 3Zn-3Zr/SBA-15 catalyst.....                                | 12 |
| <b>Figure S14.</b> Deconvolution of NH <sub>3</sub> -TPD profile of 4Zn-3Zr/SBA-15 catalyst.....                                | 13 |
| <b>Figure S15.</b> Deconvolution of NH <sub>3</sub> -TPD profile of 5Zn-3Zr/SBA-15 catalyst.....                                | 13 |
| <b>Figure S16.</b> Deconvolution of NH <sub>3</sub> -TPD profile of 6Zn-3Zr/SBA-15 catalyst.....                                | 14 |
| <b>Figure S17.</b> Deconvolution of NH <sub>3</sub> -TPD profile of 7Zn-3Zr/SBA-15 catalyst.....                                | 14 |
| <b>Figure S18.</b> FTIR of pyridine adsorption and corresponding deconvolution over the 5Zn/SBA-15 catalyst at 300 °C. ....     | 15 |
| <b>Figure S19.</b> FTIR of pyridine adsorption and corresponding deconvolution over the 3Zr/SBA-15 catalyst at 300 °C. ....     | 15 |
| <b>Figure S20.</b> FTIR of pyridine adsorption and corresponding deconvolution over the 5Zn-3Zr/SBA-15 catalyst at 300 °C. .... | 16 |
| <b>Table S5.</b> Deconvoluted band area under the characteristic bands of xZn-yZr/SBA-15 catalysts.....                         | 16 |
| <b>Figure S21.</b> Deconvolution of CO <sub>2</sub> -TPD profile of 5Zn/SBA-15 catalyst.....                                    | 17 |
| <b>Figure S22.</b> Deconvolution of CO <sub>2</sub> -TPD profile of 5Zn-1Zr/SBA-15 catalyst.....                                | 18 |
| <b>Figure S23.</b> Deconvolution of CO <sub>2</sub> -TPD profile of 5Zn-2Zr/SBA-15 catalyst.....                                | 18 |
| <b>Figure S24.</b> Deconvolution of CO <sub>2</sub> -TPD profile of 5Zn-3Zr/SBA-15 catalyst.....                                | 19 |
| <b>Figure S25.</b> Deconvolution of CO <sub>2</sub> -TPD profile of 5Zn-4Zr/SBA-15 catalyst.....                                | 19 |
| <b>Figure S26.</b> Deconvolution of CO <sub>2</sub> -TPD profile of 5Zn-5Zr/SBA-15 catalyst.....                                | 20 |
| <b>Figure S27.</b> Deconvolution of CO <sub>2</sub> -TPD profile of 3Zr/SBA-15 catalyst.....                                    | 20 |
| <b>Figure S28.</b> Deconvolution of CO <sub>2</sub> -TPD profile of 3Zn-3Zr/SBA-15 catalyst.....                                | 21 |
| <b>Figure S29.</b> Deconvolution of CO <sub>2</sub> -TPD profile of 4Zn-3Zr/SBA-15 catalyst.....                                | 21 |
| <b>Figure S30.</b> Deconvolution of CO <sub>2</sub> -TPD profile of 5Zn-3Zr/SBA-15 catalyst.....                                | 22 |
| <b>Figure S31.</b> Deconvolution of CO <sub>2</sub> -TPD profile of 6Zn-3Zr/SBA-15 catalyst.....                                | 22 |
| <b>Figure S32.</b> Deconvolution of CO <sub>2</sub> -TPD profile of 7Zn-3Zr/SBA-15 catalyst.....                                | 23 |
| <b>Figure S33.</b> High-resolution XPS spectra of xZn-yZr/SBA-15 catalysts: (A) Zn 2p, (B) Zr 3d, (C) O 1s, and (D) Si 2p. .... | 24 |
| <b>Table S6.</b> Atomic content of constituent elements of xZn-yZr/SBA-15 catalysts. ....                                       | 25 |

**Table S1.** Catalytic performance of catalysts reported in the literature.

| Year | Catalyst                                                     | T (°C) | WHSV (h <sup>-1</sup> ) | Conv. (%) | Sel. (%) | Yield (%) | Productivity (g <sub>BD</sub> ·g <sub>cat</sub> <sup>-1</sup> ·h <sup>-1</sup> ) | Ref. |
|------|--------------------------------------------------------------|--------|-------------------------|-----------|----------|-----------|----------------------------------------------------------------------------------|------|
| 1950 | 2%Cr <sub>2</sub> O <sub>3</sub> -59%MgO-39%SiO <sub>2</sub> | 400    | 0.4                     | 68        | 56       | 38        | 0.08                                                                             | 1    |
| 1985 | SiO <sub>2</sub> -MgO (1:1 mol%)                             | 350    | 0.15                    | 50        | 84       | 42        | 0.04                                                                             | 2    |
| 1988 | Li <sup>+</sup> -containing fluorohectorite                  | 375    | 0.3                     | 32        | 48       | 16        | 0.03                                                                             | 3    |
| 2012 | 3%Cr <sub>2</sub> O <sub>3</sub> -54%MgO-43%SiO <sub>2</sub> | 350    | 0.2                     | 65        | 53       | 34        | 0.04                                                                             | 4    |
| 2012 | 3%ZnO-56%MgO-42%SiO <sub>2</sub>                             | 400    | 0.7                     | 98        | 46       | 45        | 0.18                                                                             | 4    |
| 2012 | 3%CuO-56%MgO-42%SiO <sub>2</sub>                             | 400    | 0.7                     | 86        | 53       | 44        | 0.18                                                                             | 4    |
| 2012 | 4%Ag-55%MgO-41%SiO <sub>2</sub>                              | 400    | 0.7                     | 92        | 54       | 49        | 0.20                                                                             | 4    |
| 2015 | 1%Cu-1%Zr-0.5Zn%/SiO <sub>2</sub>                            | 360    | 0.21                    | 96        | 65       | 63        | 0.08                                                                             | 5    |
| 2015 | 1%Cu-3%-Hf-0.5%Zn/SiO <sub>2</sub>                           | 360    | 0.21                    | 99        | 72       | 71        | 0.09                                                                             | 5    |
| 2015 | 3%Hf-9.3%Zn/SiO <sub>2</sub>                                 | 360    | 0.64                    | 99        | 70       | 69        | 0.26                                                                             | 5    |
| 2015 | ZnO/SiO <sub>2</sub> -MgO                                    | 375    | 0.5                     | 63        | 65       | 41        | 0.12                                                                             | 6    |
| 2016 | ZnZrO <sub>x</sub>                                           | 350    | 0.8                     | 98        | 26       | 26        | 0.12                                                                             | 7    |
| 2016 | Na-Zn-Zr <sub>10</sub> O <sub>2</sub> -H                     | 350    | 0.2                     | 97        | 47       | 46        | 0.05                                                                             | 7    |
| 2016 | ZrZn/SiO <sub>2</sub> -MgO                                   | 375    | 0.6                     | 40        | 36       | 30        | 0.11                                                                             | 8    |
| 2016 | SiO <sub>2</sub> -MgO (sol-gel)                              | 400    | 2.4                     | 40        | 40       | 16        | 0.22                                                                             | 9    |
| 2017 | Ga/SiO <sub>2</sub> -MgO                                     | 400    | 0.08                    | 99        | 53       | 52        | 0.02                                                                             | 10   |
| 2017 | Cs <sub>2</sub> O-ZnO-ZrO <sub>2</sub> /SiO <sub>2</sub>     | 400    | 1                       | 98        | 56       | 55        | 0.32                                                                             | 11   |
| 2018 | 2%Cu/2%Zr-MTW                                                | 375    | 0.5                     | 81        | 68       | 55        | 0.16                                                                             | 12   |
| 2018 | t-ZrO <sub>2</sub> +Cu/ZnO/Al <sub>2</sub> O <sub>3</sub>    | 400    | 2.9                     | 76        | 54       | 42        | 0.72                                                                             | 13   |
| 2018 | Zn-Talc                                                      | 400    | 8.4                     | 46        | 48       | 22        | 1.07                                                                             | 14   |
| 2018 | 6.1%Zn-3.4%Ta-TUD-1                                          | 400    | 8                       | 82        | 63       | 52        | 2.44                                                                             | 15   |
| 2019 | Cu-Ta/SiO <sub>2</sub>                                       | 355    | 1.1                     | 75        | 31       | 23        | 0.15                                                                             | 16   |
| 2019 | 3%Hf-9.3%Zn/SiO <sub>2</sub>                                 | 360    | 1.12                    | 87        | 43       | 38        | 0.25                                                                             | 17   |
| 2019 | 3%Hf-9.3%Zn/SiO <sub>2</sub>                                 | 360    | 11.2                    | 50        | 29       | 15        | 0.96                                                                             | 17   |
| 2019 | ZnO/t-ZrO <sub>2</sub>                                       | 375    | 2.8                     | 94        | 47       | 44        | 0.72                                                                             | 18   |
| 2019 | Hf-Zn/SiO <sub>2</sub>                                       | 380    | 1.1                     | 98        | 52       | 51        | 0.32                                                                             | 19   |
| 2020 | ZnO-CeO <sub>2</sub> /SBA-15                                 | 375    | 1.60                    | 79        | 45       | 36        | 0.33                                                                             | 20   |
| 2020 | ZnO/SiO <sub>2</sub> -MgO                                    | 400    | 0.5                     | 85        | 53       | 45        | 0.13                                                                             | 21   |
| 2020 | ZnO-ZrO <sub>2</sub> /SiO <sub>2</sub>                       | 400    | 5.0                     | 67        | 59       | 39        | 1.14                                                                             | 22   |
| 2020 | 0.15Zn-0.225Y-DeAlBEA                                        | 400    | 12.24                   | 94        | 52       | 49        | 3.52                                                                             | 23   |
| 2021 | 2%Zn-8%Y/beta                                                | 400    | 7.9                     | 82        | 63       | 52        | 2.41                                                                             | 24   |
| 2021 | ZnZrTUD-1                                                    | 400    | 0.38                    | 85        | 63       | 53        | 0.12                                                                             | 25   |
| 2022 | 10%SiO <sub>2</sub> -ZrO <sub>2</sub>                        | 350    | 2.5                     | 95        | 80       | 76        | 1.12                                                                             | 26   |
| 2022 | Y-Zn <sub>0.02</sub> Zr <sub>0.02</sub> /Si-beta             | 350    | 1.0                     | 80        | 60       | 48        | 0.28                                                                             | 27   |
| 2022 | Cu <sub>1</sub> Zn <sub>2</sub> Y <sub>3</sub> /SiBEA        | 375    | 1                       | 99        | 70       | 69        | 0.41                                                                             | 28   |
| 2022 | 10%ZnCe@SBA-15                                               | 375    | 1.62                    | 78        | 40       | 31        | 0.30                                                                             | 29   |
| 2022 | ZnZr/SiO <sub>2</sub>                                        | 400    | 0.77                    | 92        | 61       | 56        | 0.25                                                                             | 30   |
| 2022 | 5%LaZnZr/Si-beta                                             | 350    | 1.0                     | 83        | 61       | 51        | 0.30                                                                             | 31   |
| 2023 | 5Zn-3Zr/SBA-15                                               | 375    | 1.18                    | 94        | 51       | 48        | 0.33                                                                             | This |

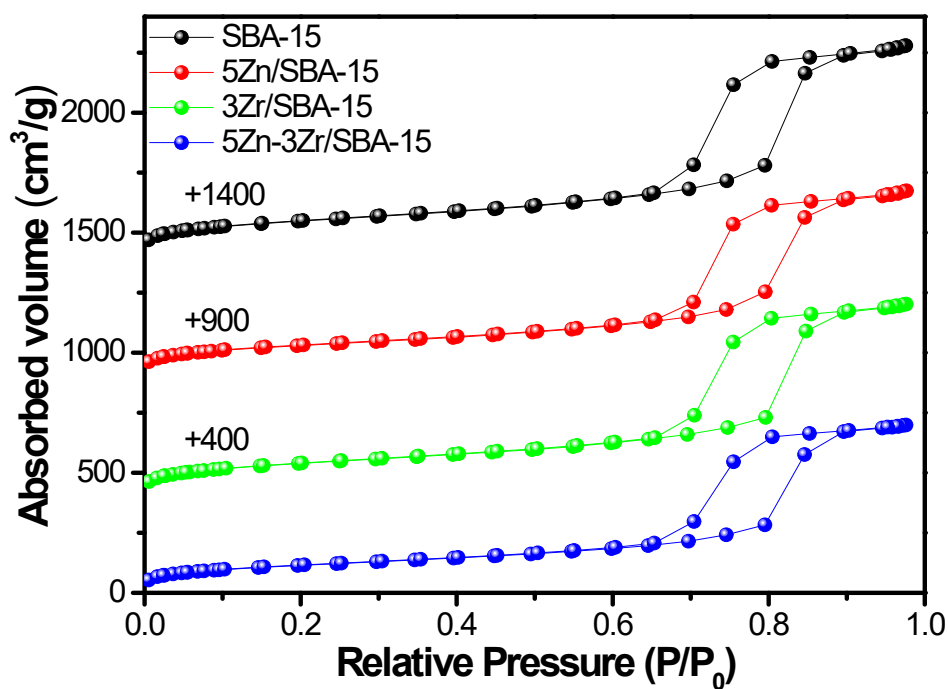

**Figure S1.** N<sub>2</sub> adsorption-desorption of the SBA-15 support and xZn-yZr/SBA-15 catalysts.

**Table S2.** Textural properties of the SBA-15 support and xZn-yZr/SBA-15 catalysts.

| Catalyst       | S <sub>BET</sub> <sup>[a]</sup><br>(m <sup>2</sup> /g) | V <sub>t</sub> <sup>[b]</sup><br>(cm <sup>3</sup> /g) | D <sub>pore</sub> <sup>[c]</sup><br>(nm) |
|----------------|--------------------------------------------------------|-------------------------------------------------------|------------------------------------------|
| SBA-15         | 534.8                                                  | 1.34                                                  | 3.97                                     |
| 5Zn/SBA-15     | 468.0                                                  | 1.12                                                  | 3.97                                     |
| 3Zr/SBA-15     | 504.8                                                  | 1.21                                                  | 3.97                                     |
| 5Zn-3Zr/SBA-15 | 413.5                                                  | 1.06                                                  | 3.97                                     |

[a] BET surface area; [b] Single point pore volume at P/P<sub>0</sub>=0.99; [c] Average pore diameter calculated by DFT method.

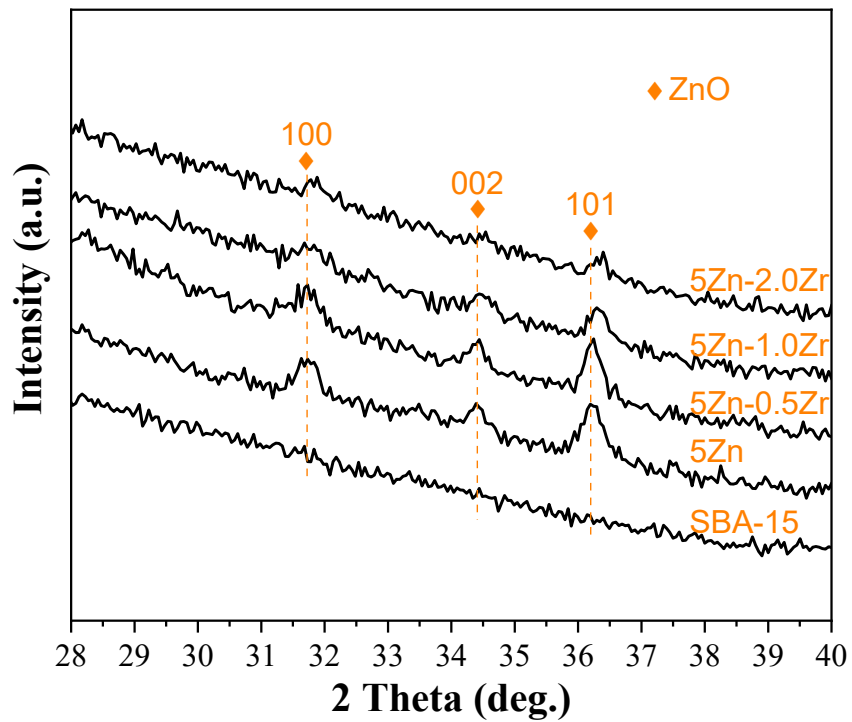

**Figure S2.** Zoom in of the region of 28-40° of Figure 1A.

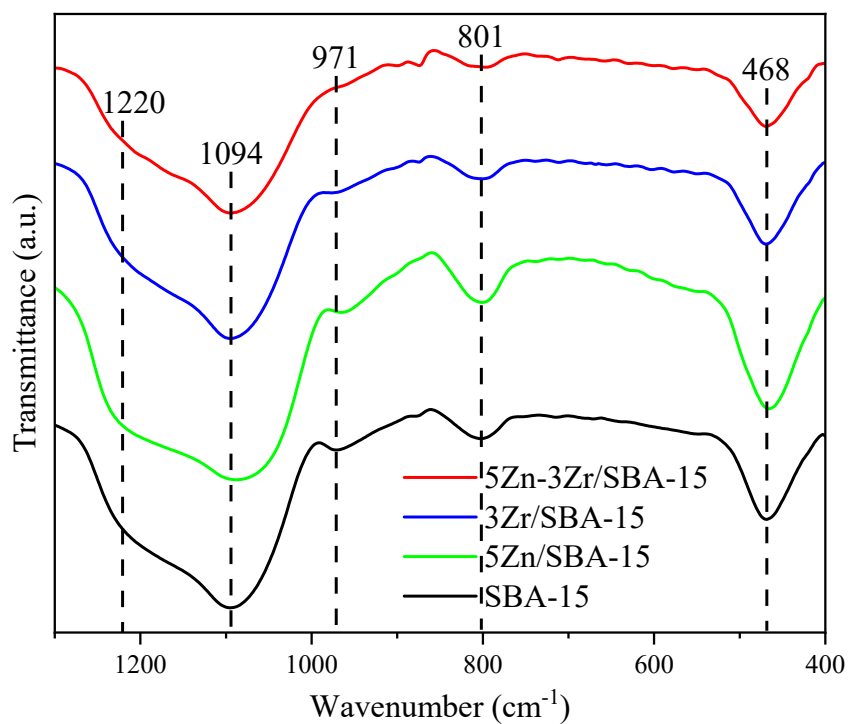

**Figure S3.** FTIR spectra of xZn-yZr/SBA-15 catalysts.

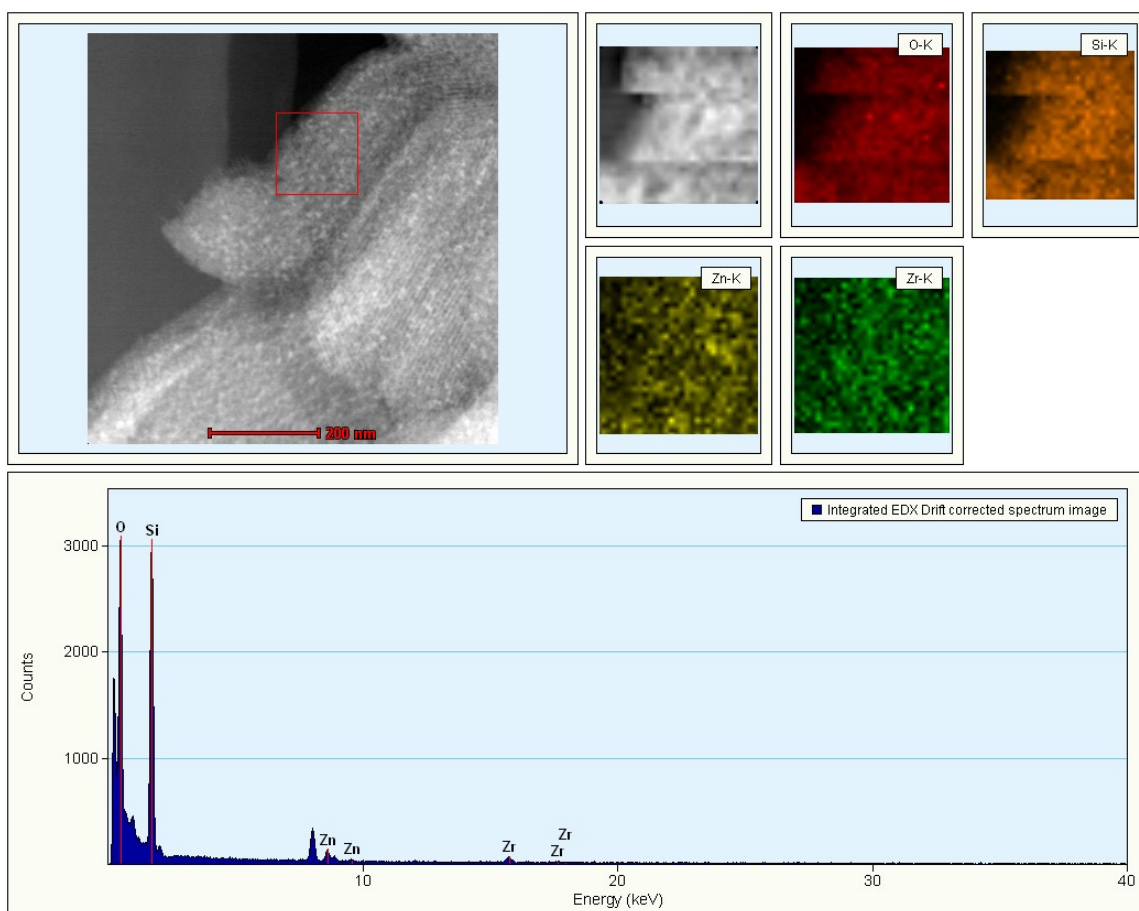

**Figure S4.** Element maps of 5Zn-3Zr/SBA-15 catalyst.

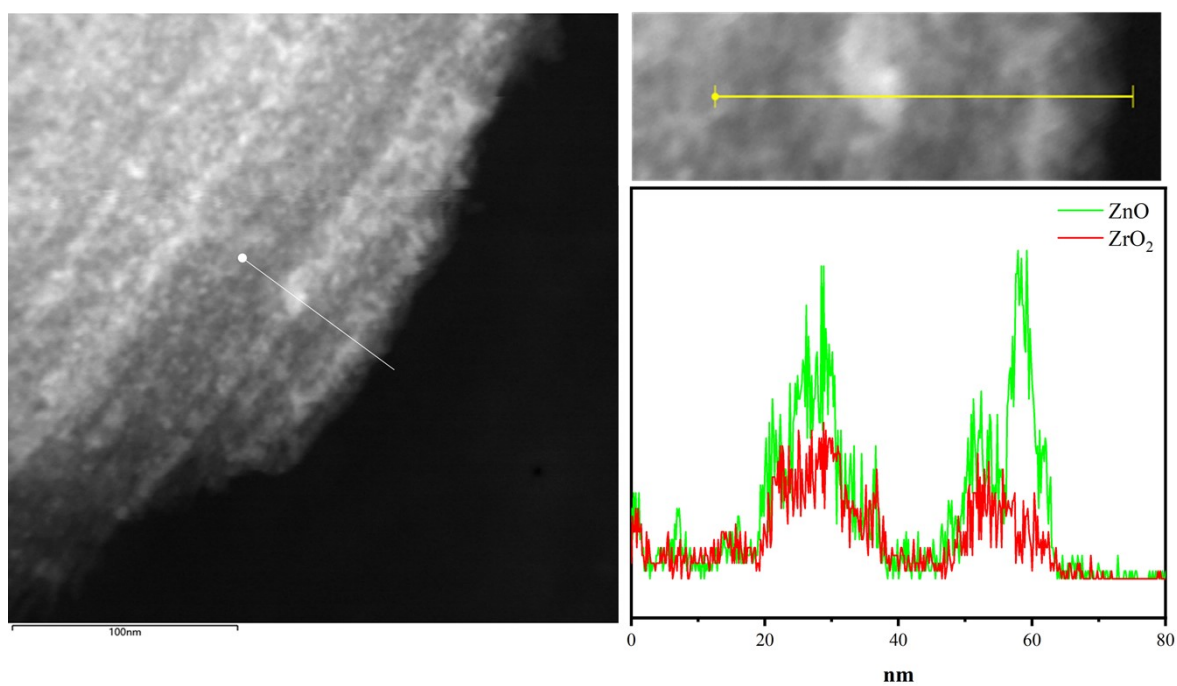

**Figure S5.** EDS line scan of 5Zn-3Zr/SBA-15 catalyst.

**Table S3.** Acid-base properties of xZn-yZr/SBA-15 catalysts with various contents of ZrO<sub>2</sub>.

| Catalyst | Acidic sites concentration <sup>[a]</sup>       |       |       |       | Basic sites concentration <sup>[b]</sup>        |       |       |       |
|----------|-------------------------------------------------|-------|-------|-------|-------------------------------------------------|-------|-------|-------|
|          | (mmol·g <sup>-1</sup> ), [T(°C)] <sup>[c]</sup> |       |       |       | (mmol·g <sup>-1</sup> ), [T(°C)] <sup>[c]</sup> |       |       |       |
|          | SBA-15                                          | Zn    | Zr    | Si-OH | SBA-15                                          | Zn/Zr | Zn/Zr | Si-OH |
| 5Zn      | 0.026                                           | 0.067 |       | 0.095 | 0.016                                           | 0.028 | 0.033 | 0.102 |
|          | [197]                                           | [336] |       | [740] | [190]                                           | [306] | [438] | [792] |
| 5Zn-1Zr  | 0.016                                           | 0.041 | 0.005 | 0.069 | 0.016                                           | 0.038 | 0.027 | 0.093 |
|          | [185]                                           | [327] | [491] | [747] | [198]                                           | [332] | [470] | [786] |
| 5Zn-2Zr  | 0.027                                           | 0.067 | 0.013 | 0.107 | 0.014                                           | 0.048 | 0.020 | 0.083 |
|          | [188]                                           | [331] | [492] | [754] | [203]                                           | [360] | [510] | [790] |
| 5Zn-3Zr  | 0.025                                           | 0.074 | 0.019 | 0.117 | 0.015                                           | 0.048 | 0.016 | 0.087 |
|          | [200]                                           | [338] | [508] | [771] | [210]                                           | [367] | [510] | [776] |
| 5Zn-4Zr  | 0.031                                           | 0.073 | 0.019 | 0.089 | 0.016                                           | 0.056 | 0.020 | 0.085 |
|          | [196]                                           | [325] | [489] | [747] | [198]                                           | [366] | [526] | [800] |
| 5Zn-5Zr  | 0.036                                           | 0.074 | 0.030 | 0.144 | 0.016                                           | 0.059 | 0.024 | 0.075 |
|          | [195]                                           | [327] | [495] | [762] | [196]                                           | [371] | [545] | [800] |

[a] Determined by NH<sub>3</sub>-TPD; [b] Determined by CO<sub>2</sub>-TPD; [c] The desorption temperature of TPD peaks.

**Table S4.** Acid-base properties of xZn-yZr/SBA-15 catalysts with various contents of ZnO.

| Catalyst | Acidic sites concentration <sup>[a]</sup>       |       |       |       | Basic sites concentration <sup>[b]</sup>        |       |       |       |
|----------|-------------------------------------------------|-------|-------|-------|-------------------------------------------------|-------|-------|-------|
|          | (mmol·g <sup>-1</sup> ), [T(°C)] <sup>[c]</sup> |       |       |       | (mmol·g <sup>-1</sup> ), [T(°C)] <sup>[c]</sup> |       |       |       |
|          | SBA-15                                          | Zn    | Zr    | Si-OH | SBA-15                                          | Zn/Zr | Zn/Zr | Si-OH |
| 3Zr      | 0.048                                           |       | 0.063 | 0.101 | 0.023                                           | 0.078 | 0.023 | 0.175 |
|          | [208]                                           |       | [457] | [776] | [228]                                           | [390] | [550] | [760] |
| 3Zn-3Zr  | 0.031                                           | 0.055 | 0.033 | 0.109 | 0.019                                           | 0.065 | 0.018 | 0.159 |
|          | [190]                                           | [330] | [488] | [764] | [225]                                           | [379] | [535] | [761] |
| 4Zn-3Zr  | 0.021                                           | 0.057 | 0.010 | 0.156 | 0.015                                           | 0.054 | 0.013 | 0.113 |
|          | [194]                                           | [332] | [493] | [771] | [208]                                           | [371] | [514] | [766] |
| 5Zn-3Zr  | 0.025                                           | 0.074 | 0.019 | 0.117 | 0.015                                           | 0.048 | 0.016 | 0.087 |
|          | [200]                                           | [338] | [508] | [771] | [210]                                           | [367] | [510] | [776] |
| 6Zn-3Zr  | 0.028                                           | 0.073 | 0.025 | 0.129 | 0.015                                           | 0.048 | 0.018 | 0.168 |
|          | [199]                                           | [337] | [500] | [782] | [212]                                           | [365] | [506] | [761] |
| 7Zn-3Zr  | 0.029                                           | 0.075 | 0.025 | 0.112 | 0.016                                           | 0.049 | 0.018 | 0.126 |
|          | [196]                                           | [328] | [493] | [781] | [210]                                           | [356] | [497] | [769] |

[a] Determined by NH<sub>3</sub>-TPD; [b] Determined by CO<sub>2</sub>-TPD; [c] The desorption temperature of TPD peaks.

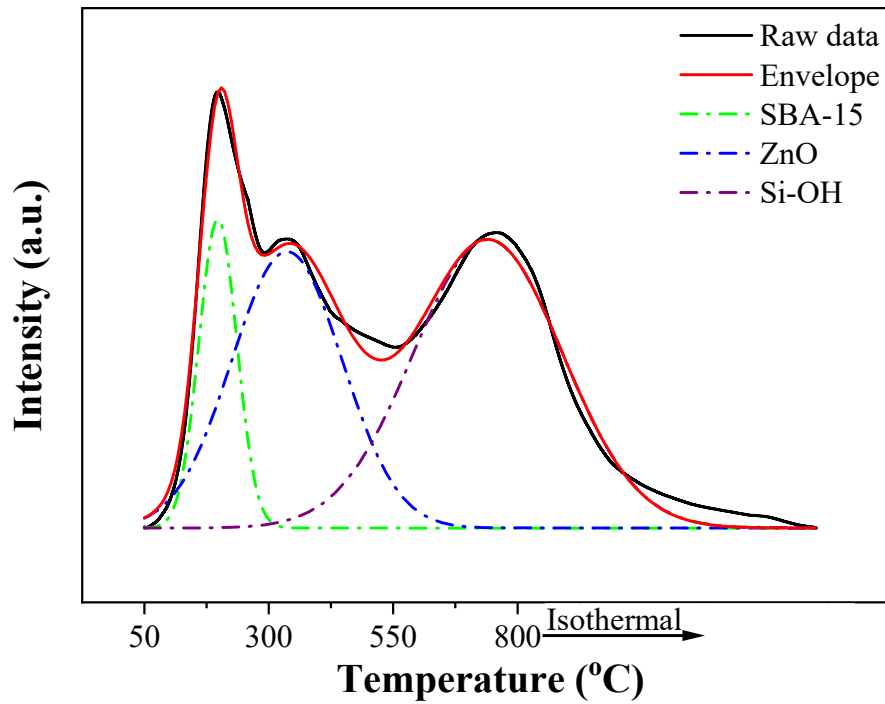

Figure S6. Deconvolution of NH<sub>3</sub>-TPD profile of 5Zn/SBA-15 catalyst.

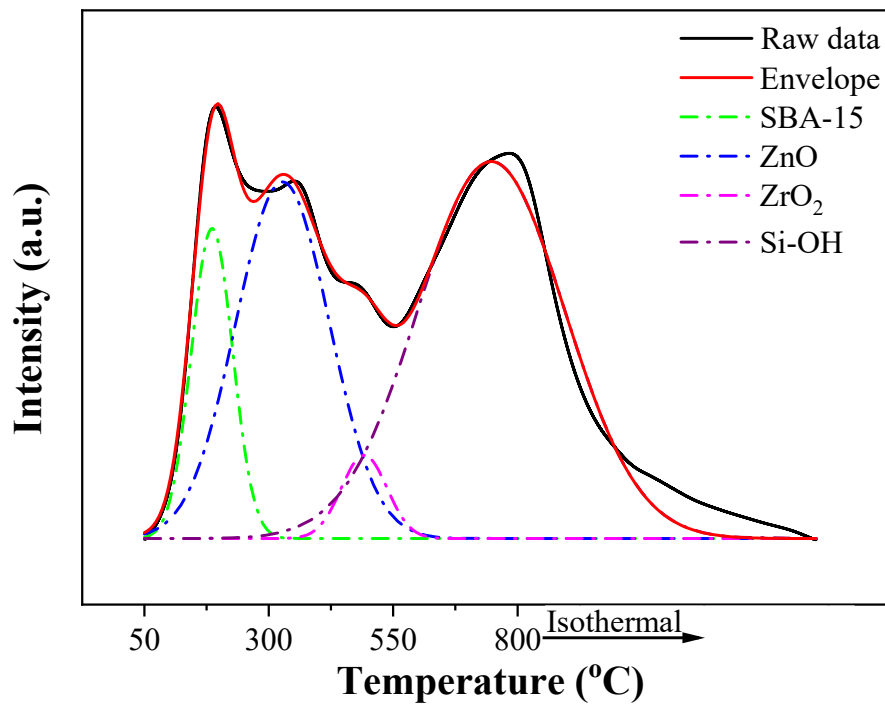

Figure S7. Deconvolution of NH<sub>3</sub>-TPD profile of 5Zn-1Zr/SBA-15 catalyst.



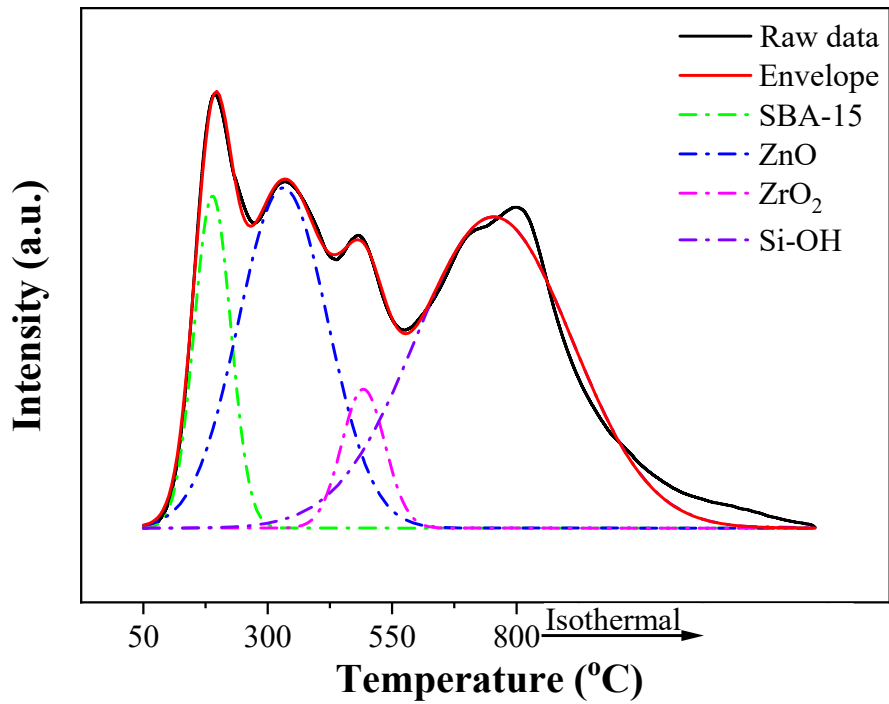

Figure S8. Deconvolution of NH<sub>3</sub>-TPD profile of 5Zn-2Zr/SBA-15 catalyst.

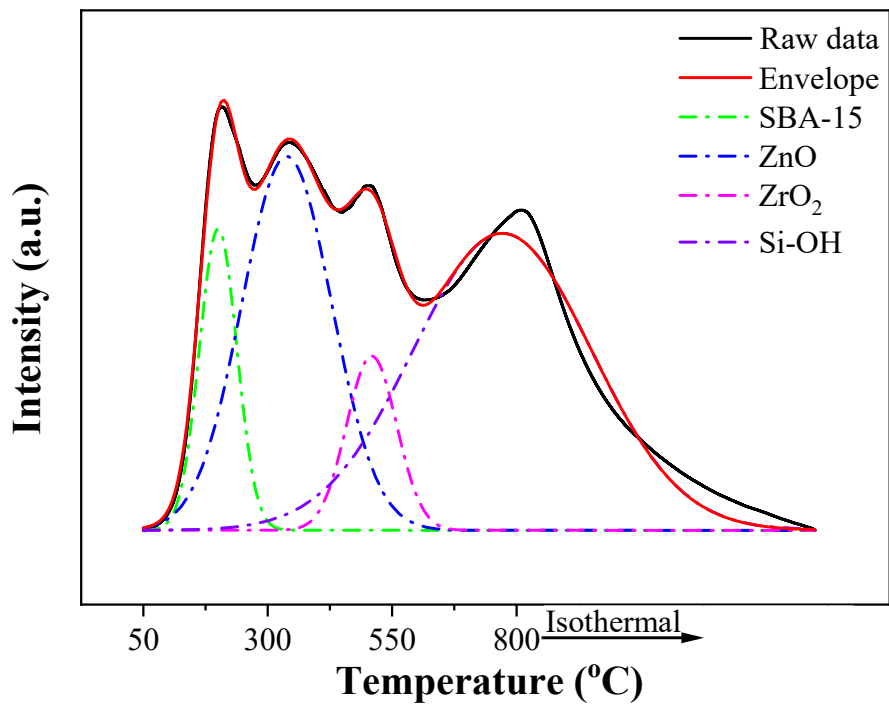

Figure S9. Deconvolution of NH<sub>3</sub>-TPD profile of 5Zn-3Zr/SBA-15 catalyst.

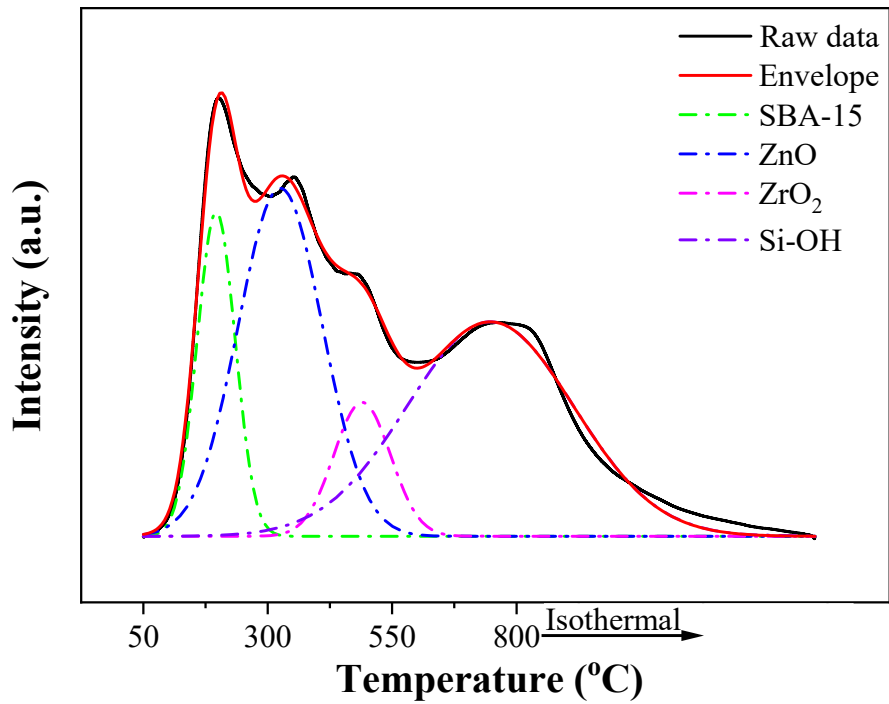

Figure S10. Deconvolution of NH<sub>3</sub>-TPD profile of 5Zn-4Zr/SBA-15 catalyst.

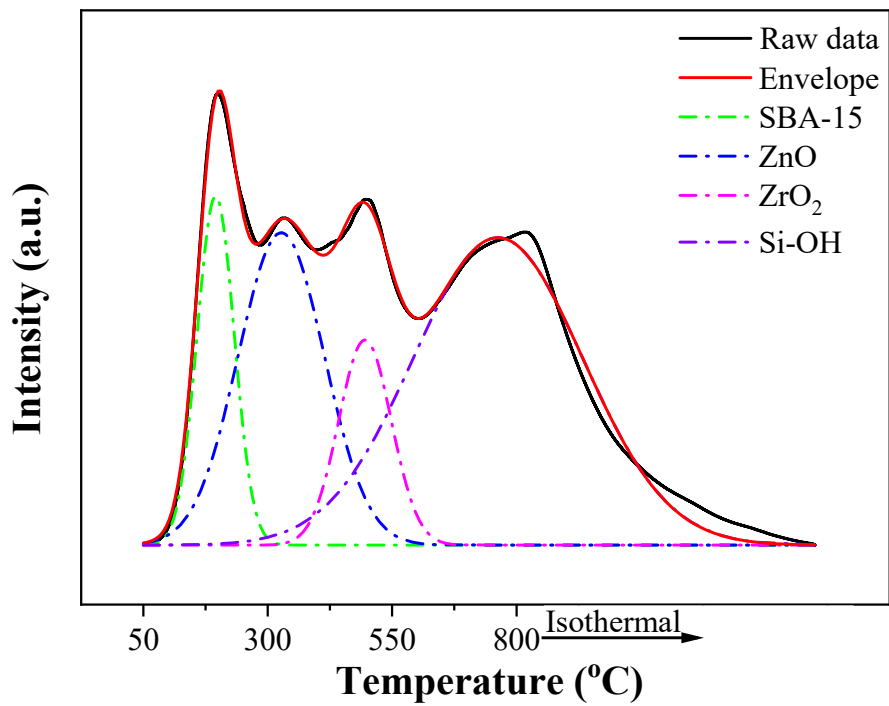

Figure S11. Deconvolution of NH<sub>3</sub>-TPD profile of 5Zn-5Zr/SBA-15 catalyst.

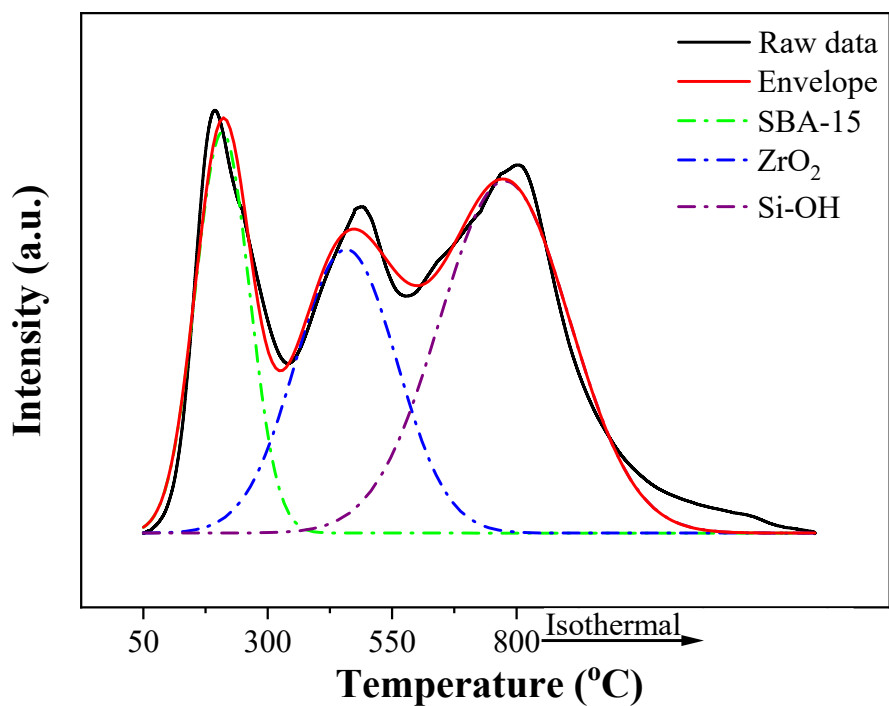

Figure S12. Deconvolution of NH<sub>3</sub>-TPD profile of 3Zr/SBA-15 catalyst.

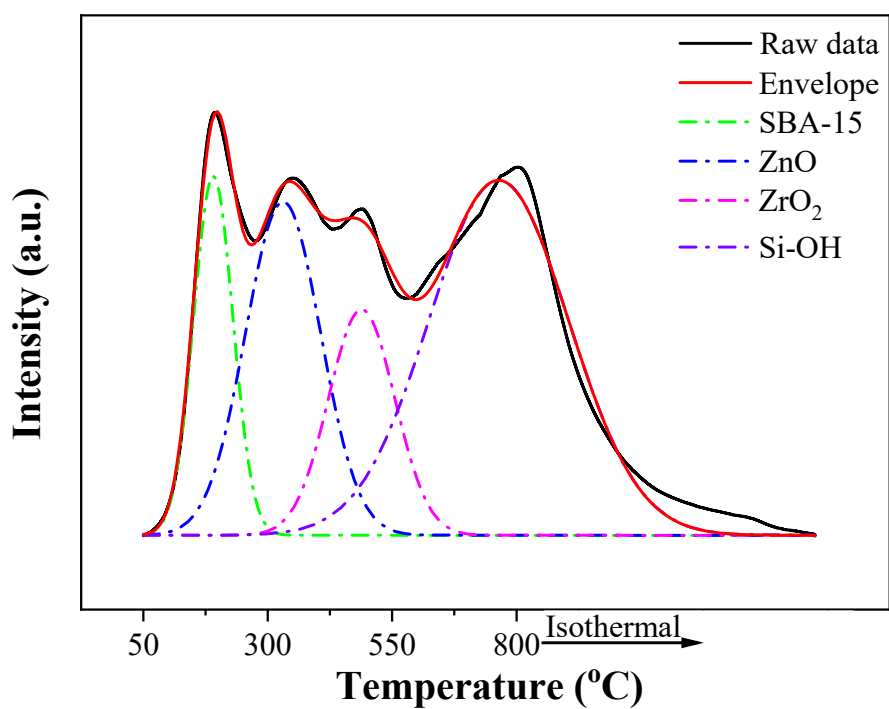

Figure S13. Deconvolution of NH<sub>3</sub>-TPD profile of 3Zn-3Zr/SBA-15 catalyst.

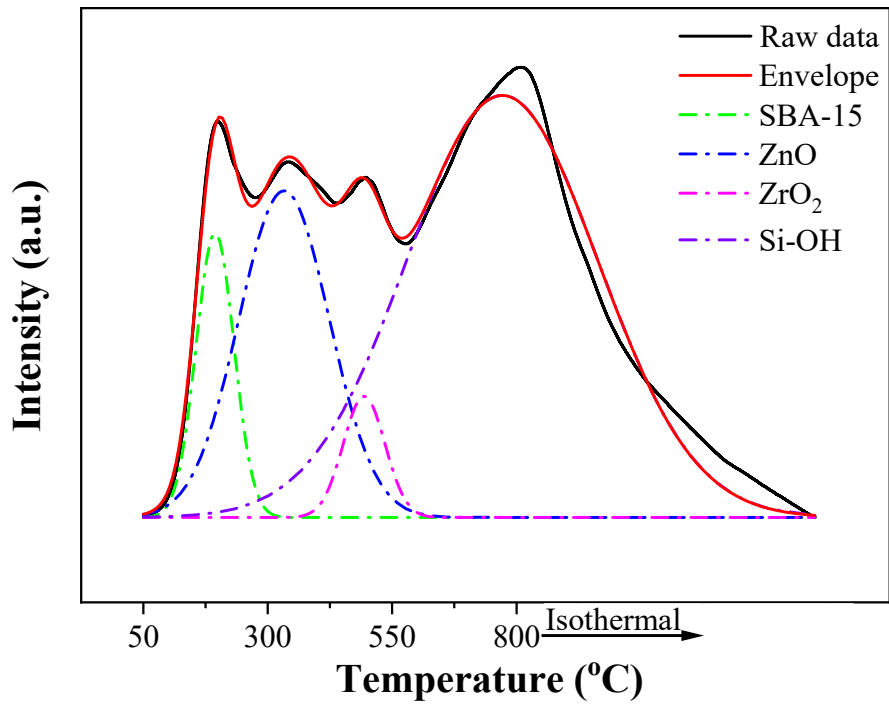

Figure S14. Deconvolution of NH<sub>3</sub>-TPD profile of 4Zn-3Zr/SBA-15 catalyst.

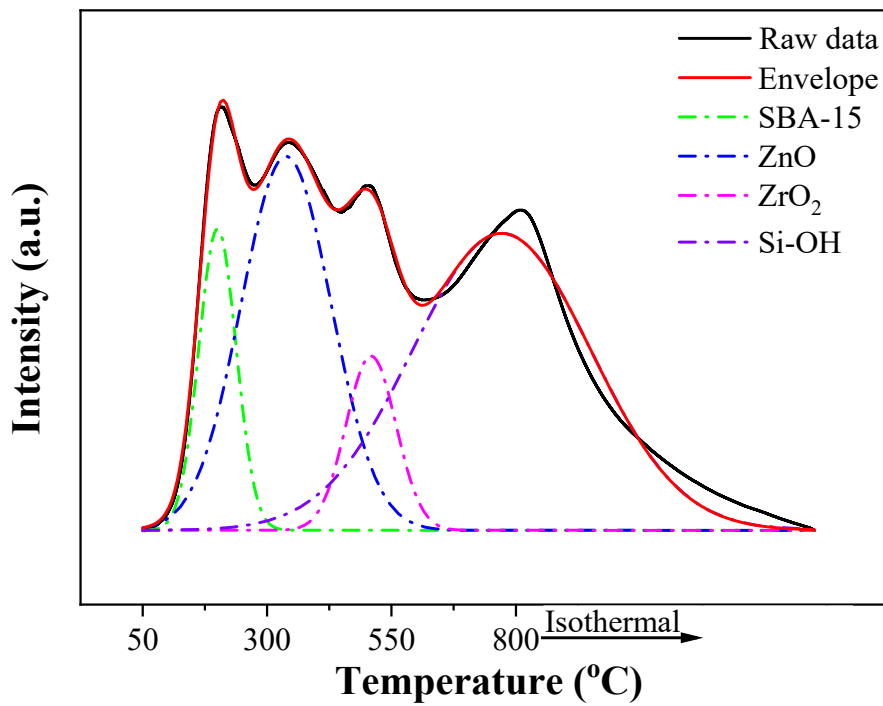

Figure S15. Deconvolution of NH<sub>3</sub>-TPD profile of 5Zn-3Zr/SBA-15 catalyst.

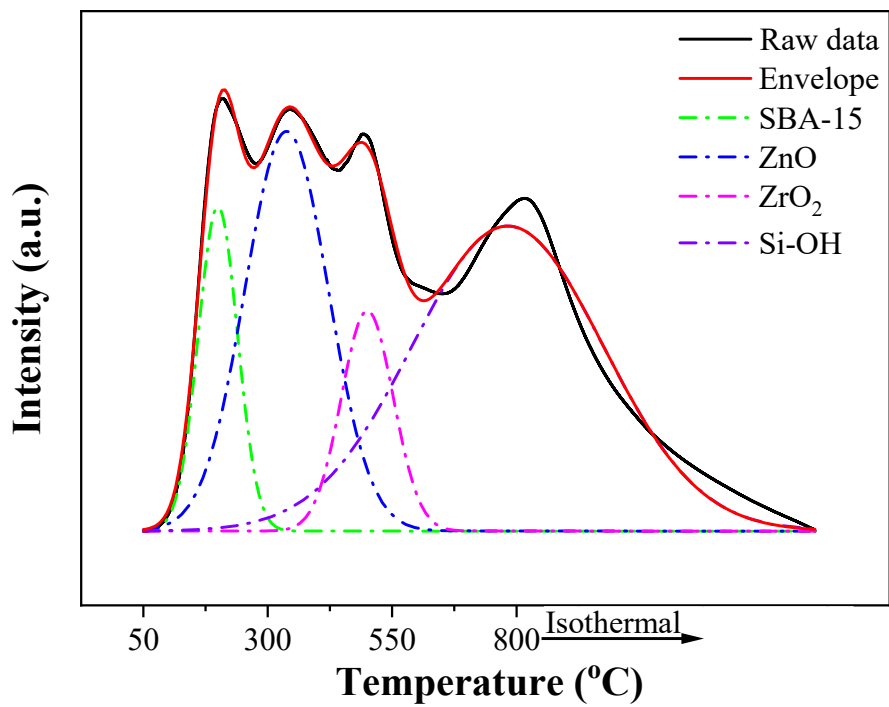

Figure S16. Deconvolution of NH<sub>3</sub>-TPD profile of 6Zn-3Zr/SBA-15 catalyst.

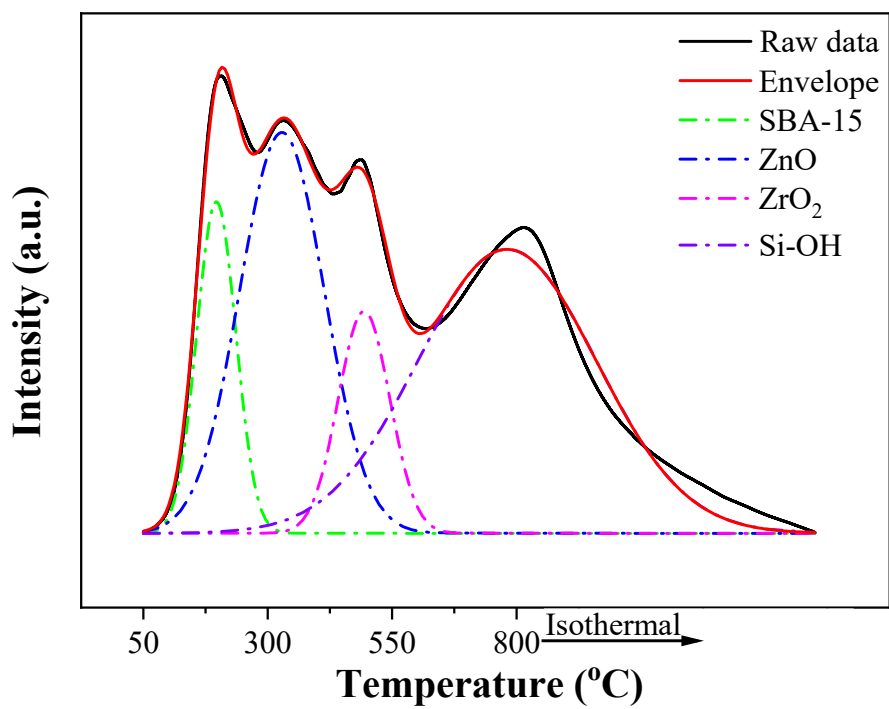

Figure S17. Deconvolution of NH<sub>3</sub>-TPD profile of 7Zn-3Zr/SBA-15 catalyst.

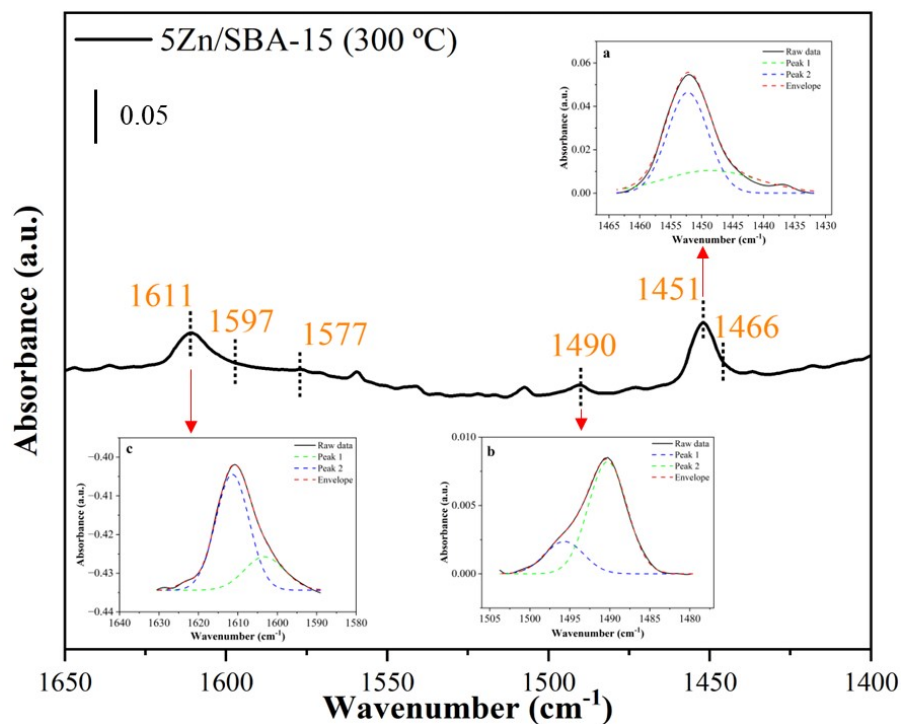

**Figure S18.** FTIR of pyridine adsorption and corresponding deconvolution over the 5Zn/SBA-15 catalyst at 300 °C.

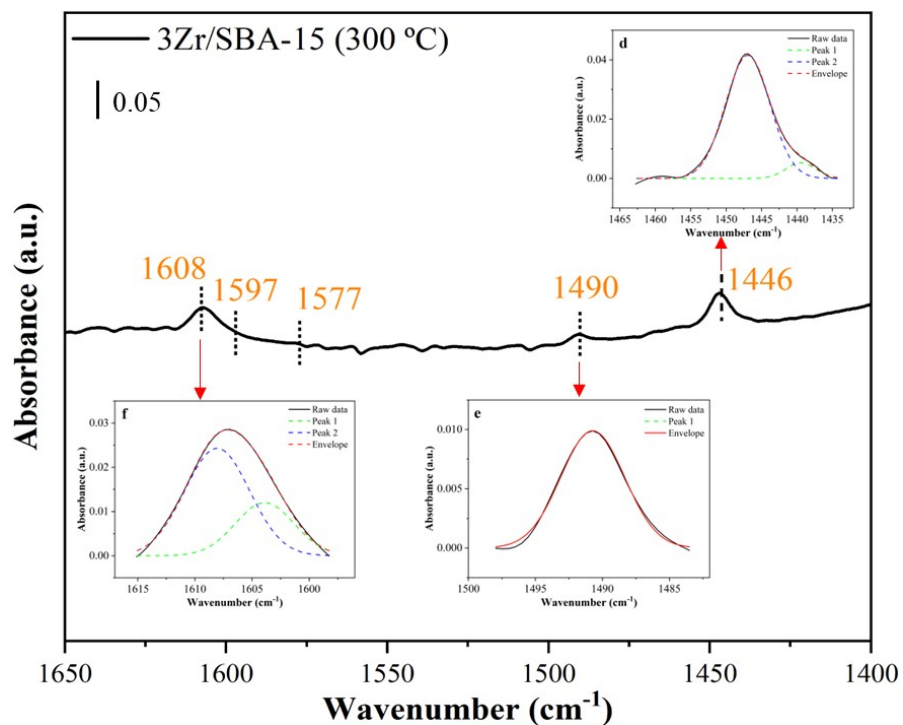

**Figure S19.** FTIR of pyridine adsorption and corresponding deconvolution over the 3Zr/SBA-15 catalyst at 300 °C.

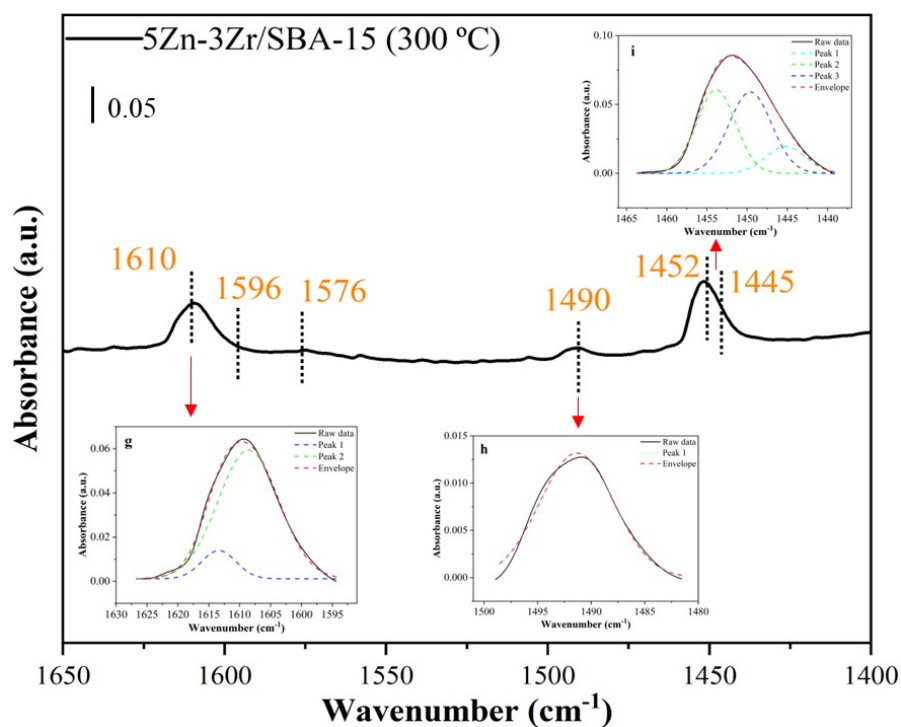

**Figure S20.** FTIR of pyridine adsorption and corresponding deconvolution over the 5Zn-3Zr/SBA-15 catalyst at 300 °C.

**Table S5.** Deconvoluted band area under the characteristic bands of xZn-yZr/SBA-15 catalysts.

| Catalyst       | Band position (cm <sup>-1</sup> ) |         |         |         |         |
|----------------|-----------------------------------|---------|---------|---------|---------|
|                | 1611                              | 1608    | 1490    | 1451    | 1446    |
| 5Zn/SBA-15     | 0.31827                           |         | 0.4953  | 0.38231 |         |
| 3Zr/SBA-15     |                                   | 0.17174 | 0.0589  |         | 0.35385 |
| 5Zn-3Zr/SBA-15 | 0.08936                           | 0.71896 | 0.11231 | 0.39349 | 0.12029 |

There is a strong correlation between the deconvolution results and the NH<sub>3</sub>-TPD results, as follows:

1. The band area at 1451 cm<sup>-1</sup> for the 5Zn/SBA-15 catalyst (0.38231) is larger than that at 1446 cm<sup>-1</sup> for the 3Zr/SBA-15 catalyst (0.35385), which aligns with the higher concentration of acidic sites in the 5Zn/SBA-15 catalyst (0.067 mmol g<sup>-1</sup>) compared to 3Zr/SBA-15 (0.063 mmol g<sup>-1</sup>).

- The band area at  $1451\text{ cm}^{-1}$  for the 5Zn-3Zr/SBA-15 catalyst (0.39349) exceeds that for the 5Zn/SBA-15 catalyst (0.38231), consistent with the higher concentration of Zn Lewis acid sites in the 5Zn-3Zr/SBA-15 catalyst ( $0.074\text{ mmol g}^{-1}$ ) compared to 5Zn/SBA-15 ( $0.067\text{ mmol g}^{-1}$ ).
- The band area at  $1446\text{ cm}^{-1}$  for the 5Zn-3Zr/SBA-15 catalyst is 0.12029, approximately one-third of that for the 3Zr/SBA-15 catalyst (0.35385), corresponding to the lower concentration of Zr Lewis acid sites in the 5Zn-3Zr/SBA-15 catalyst ( $0.019\text{ mmol g}^{-1}$ ) compared to 3Zr/SBA-15 ( $0.063\text{ mmol g}^{-1}$ ). This deviation from the nominal content suggests the deposition of ZnO onto  $\text{ZrO}_2$ .

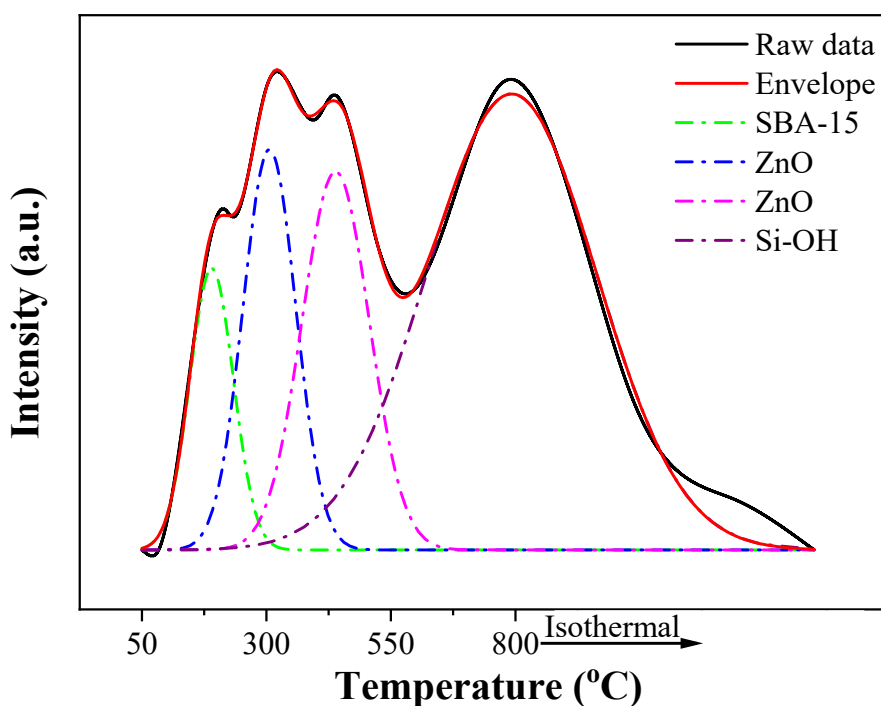

**Figure S21.** Deconvolution of  $\text{CO}_2$ -TPD profile of 5Zn/SBA-15 catalyst.



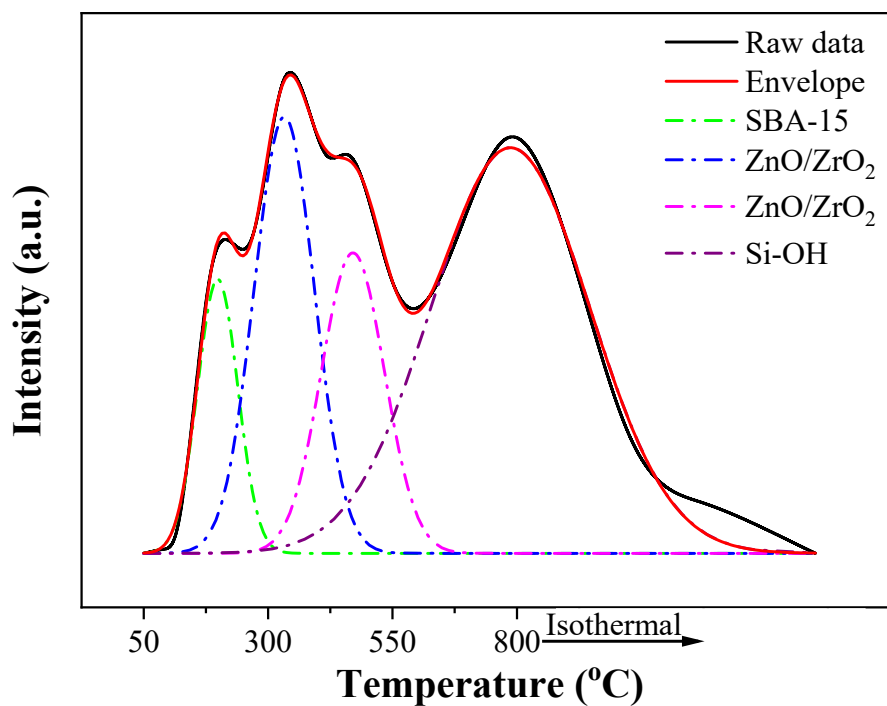

Figure S22. Deconvolution of CO<sub>2</sub>-TPD profile of 5Zn-1Zr/SBA-15 catalyst.

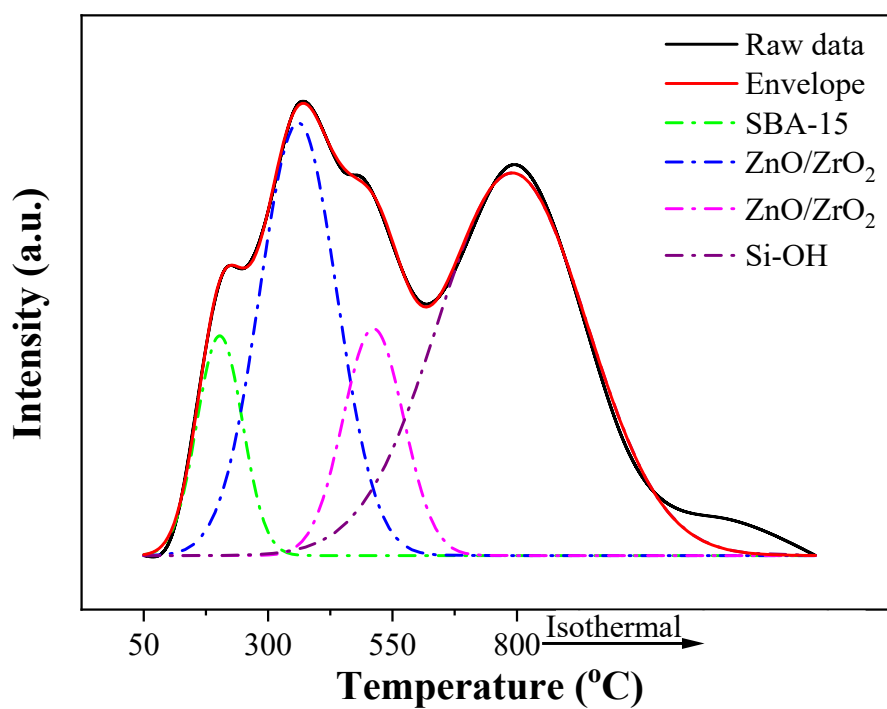

Figure S23. Deconvolution of CO<sub>2</sub>-TPD profile of 5Zn-2Zr/SBA-15 catalyst.

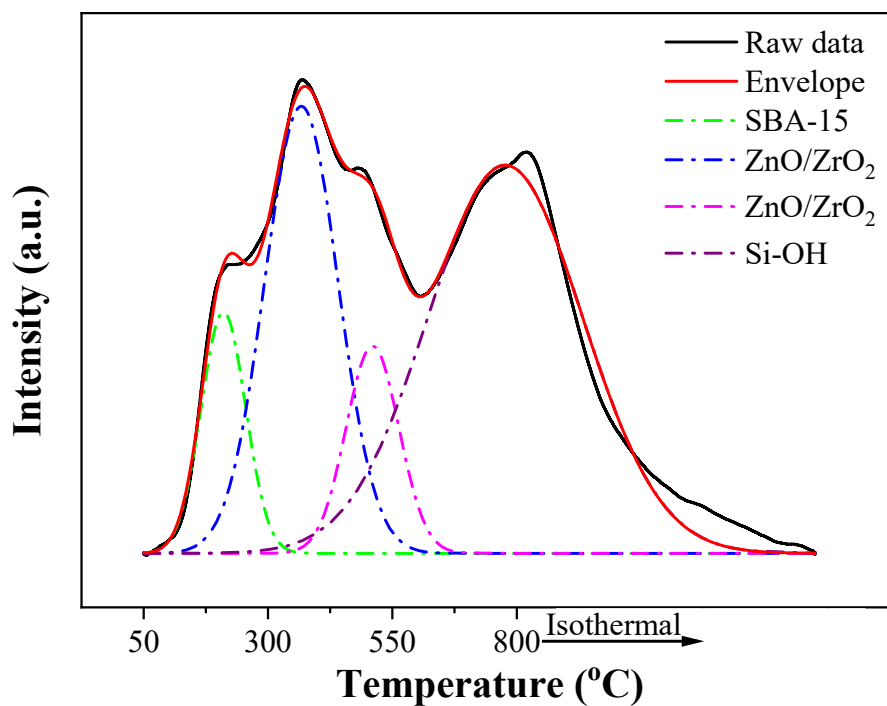

Figure S24. Deconvolution of CO<sub>2</sub>-TPD profile of 5Zn-3Zr/SBA-15 catalyst.

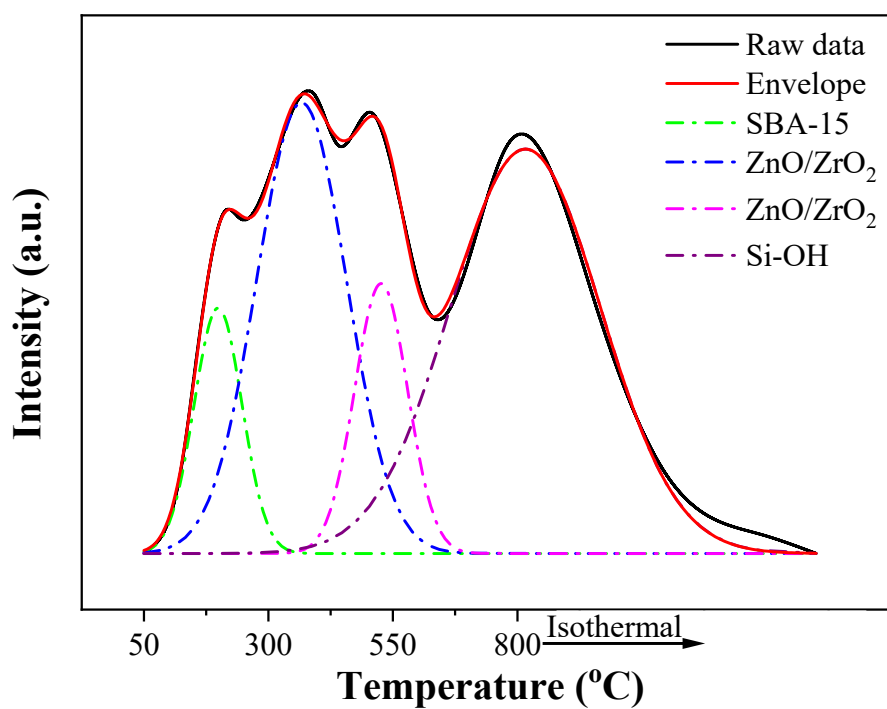

Figure S25. Deconvolution of CO<sub>2</sub>-TPD profile of 5Zn-4Zr/SBA-15 catalyst.

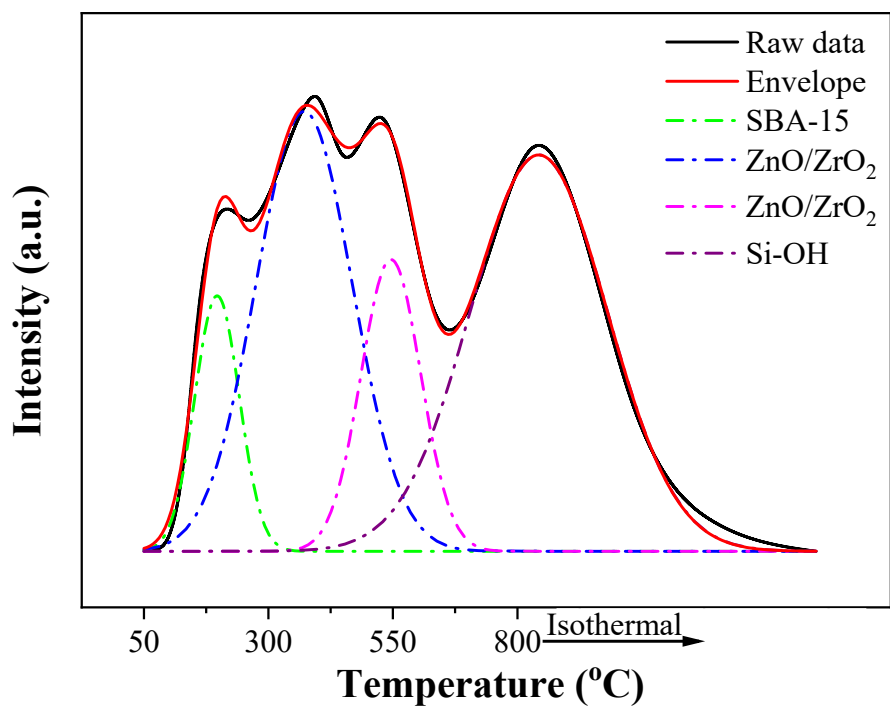

Figure S26. Deconvolution of CO<sub>2</sub>-TPD profile of 5Zn-5Zr/SBA-15 catalyst.

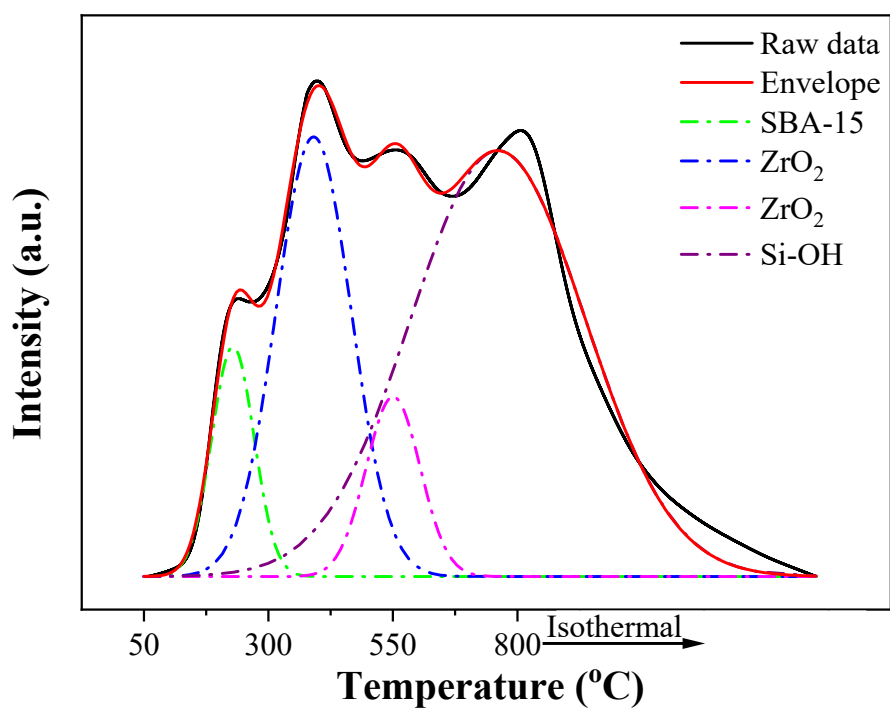

Figure S27. Deconvolution of CO<sub>2</sub>-TPD profile of 3Zr/SBA-15 catalyst.

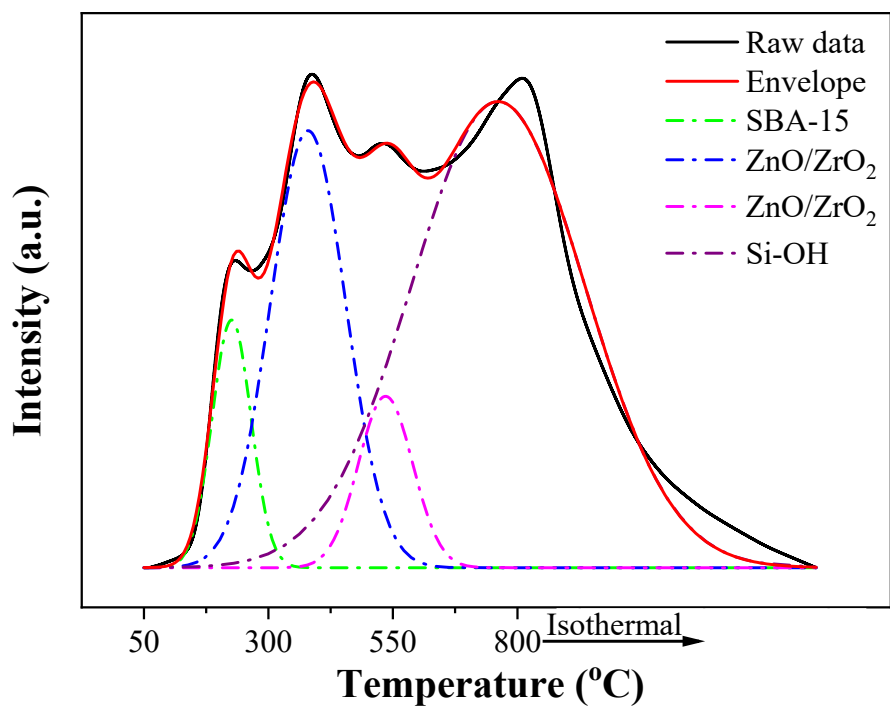

Figure S28. Deconvolution of CO<sub>2</sub>-TPD profile of 3Zn-3Zr/SBA-15 catalyst.

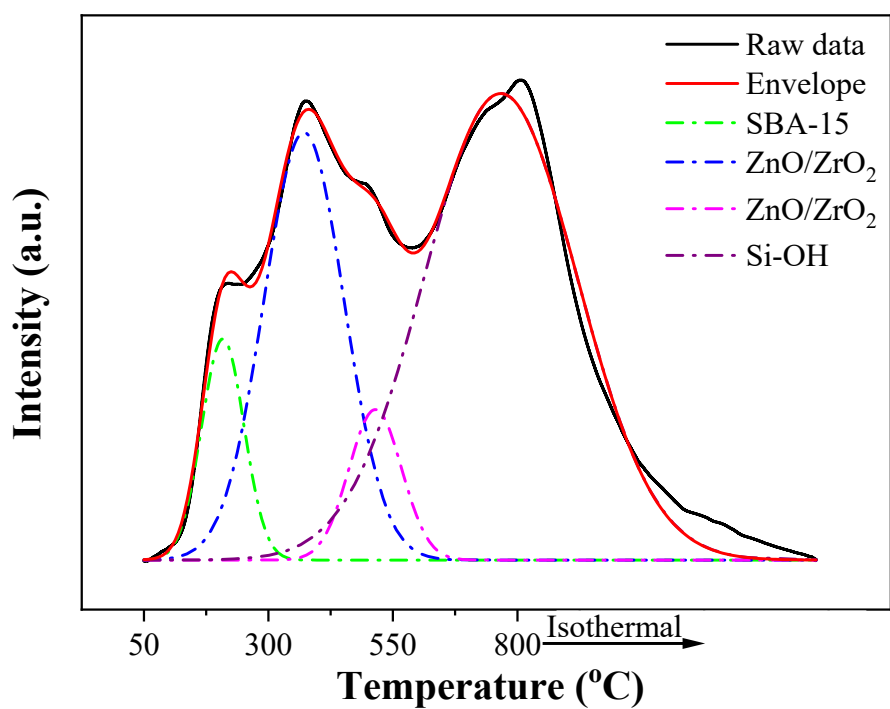

Figure S29. Deconvolution of CO<sub>2</sub>-TPD profile of 4Zn-3Zr/SBA-15 catalyst.

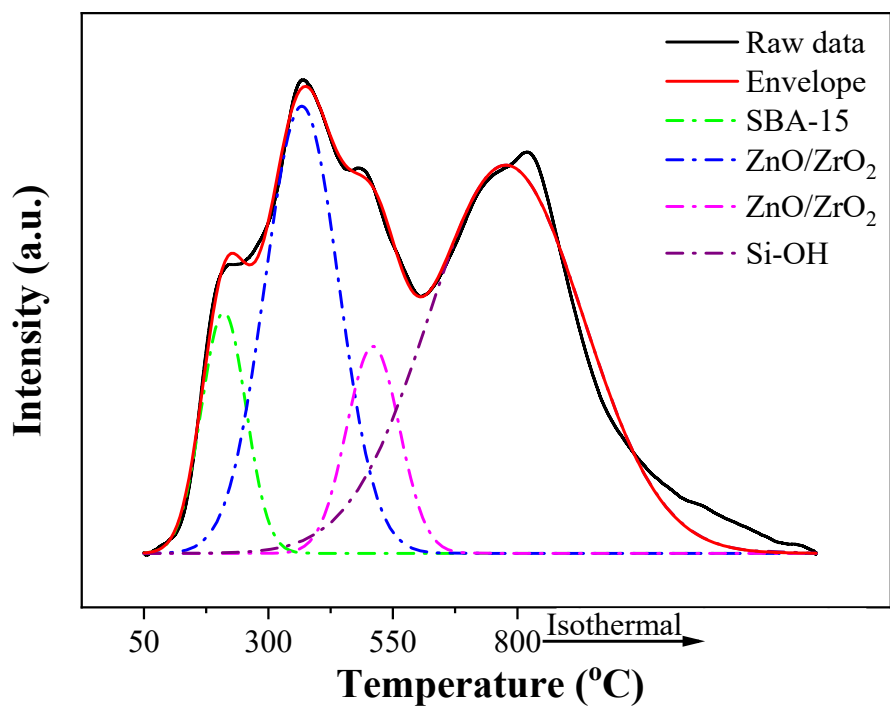

Figure S30. Deconvolution of CO<sub>2</sub>-TPD profile of 5Zn-3Zr/SBA-15 catalyst.

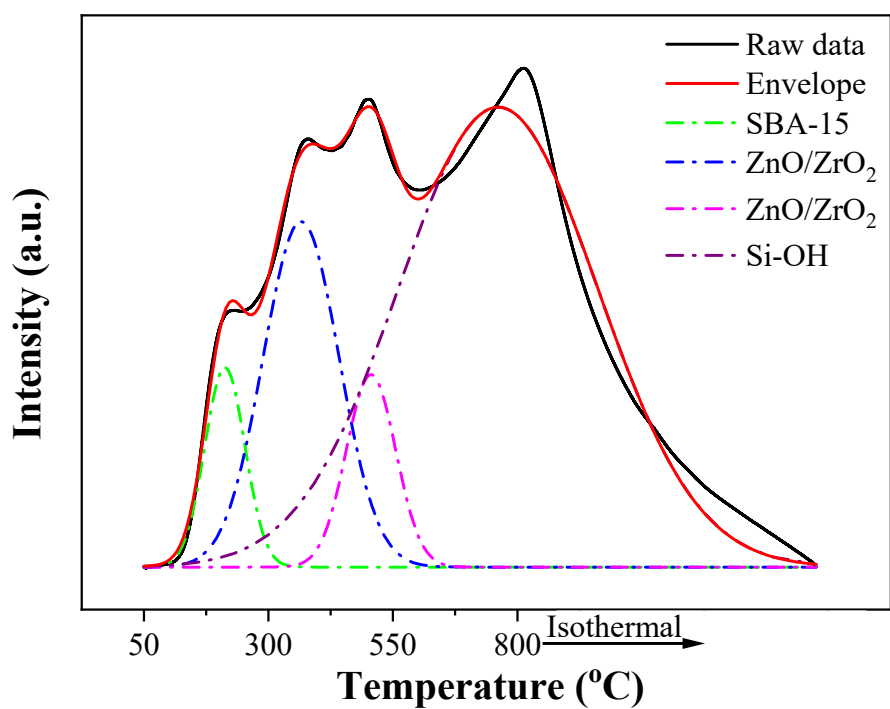

Figure S31. Deconvolution of CO<sub>2</sub>-TPD profile of 6Zn-3Zr/SBA-15 catalyst.

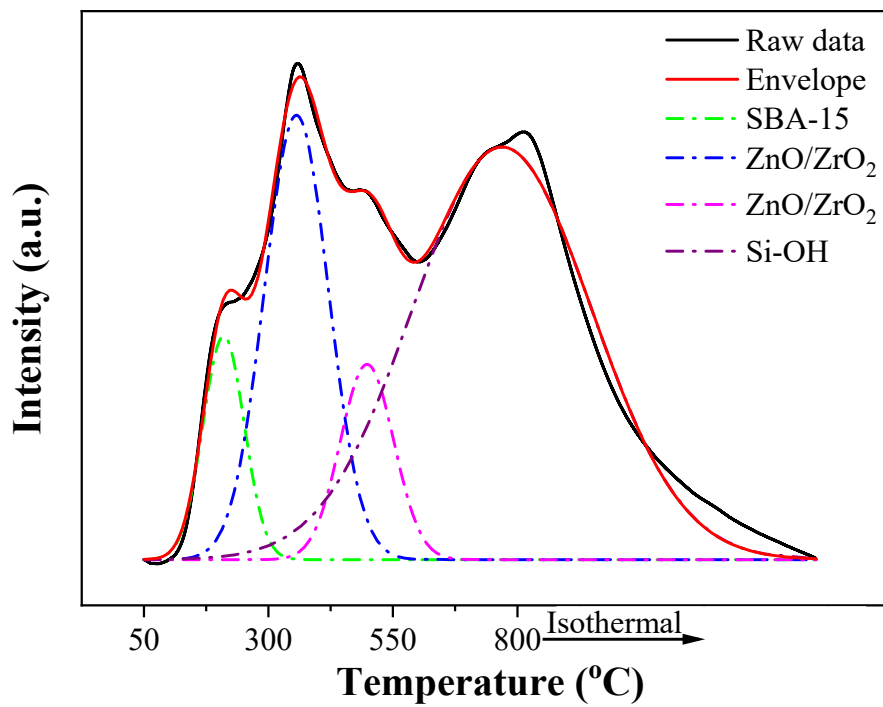

**Figure S32.** Deconvolution of CO<sub>2</sub>-TPD profile of 7Zn-3Zr/SBA-15 catalyst.

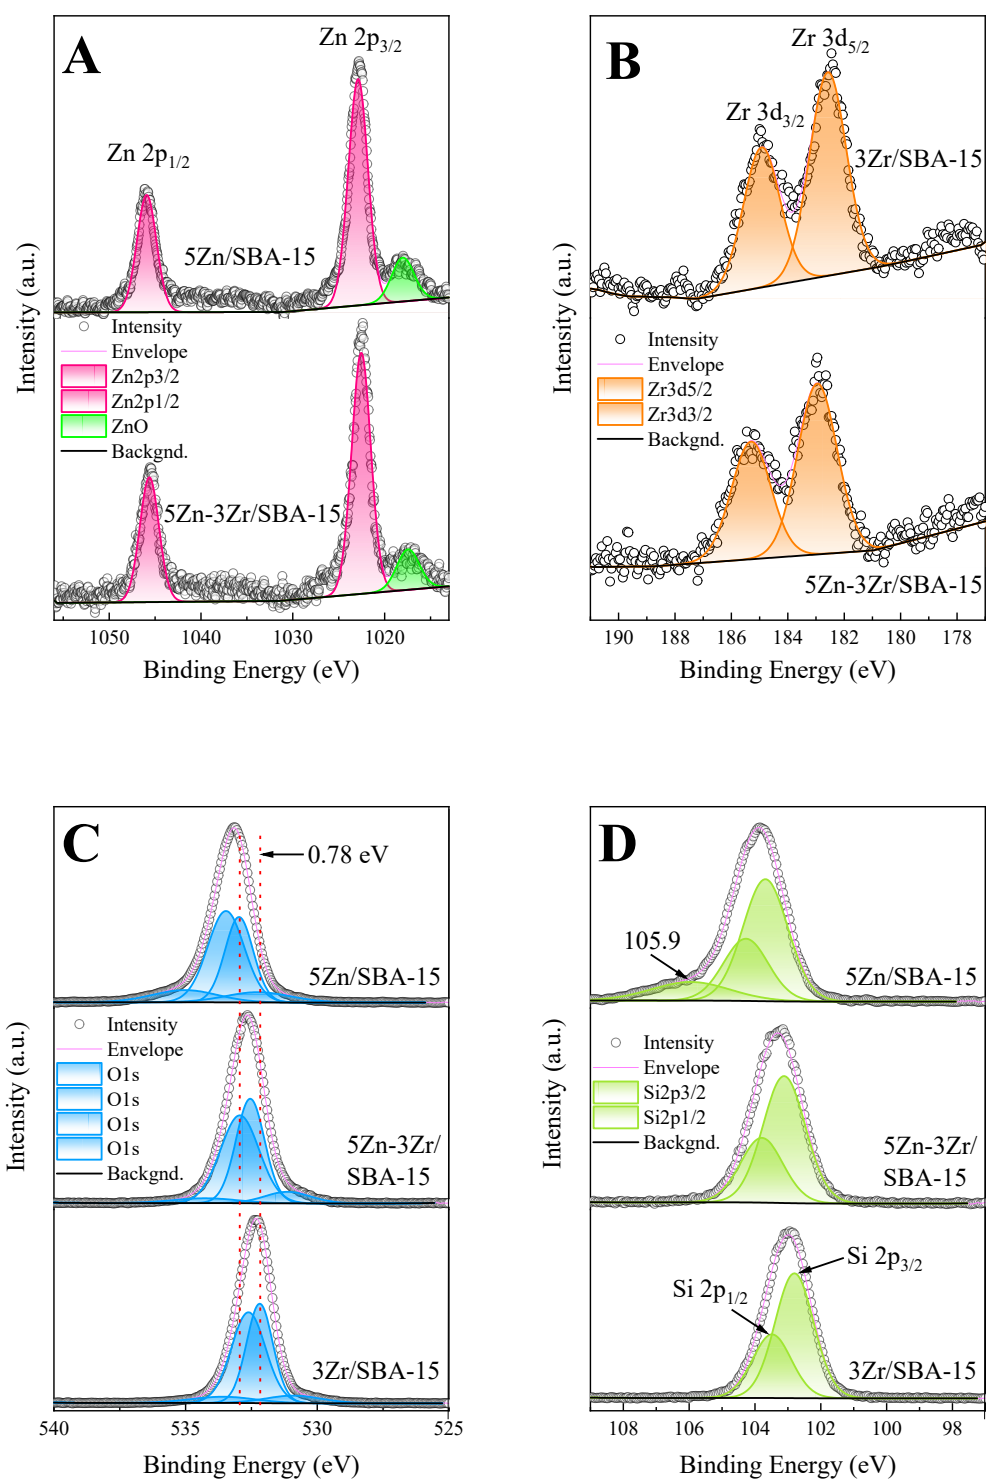

**Figure S33.** High-resolution XPS spectra of  $x\text{Zn}-y\text{Zr}/\text{SBA-15}$  catalysts: (A) Zn 2p, (B) Zr 3d, (C) O 1s, and (D) Si 2p.

**Table S6.** Atomic content of constituent elements of xZn-yZr/SBA-15 catalysts.

| Catalyst       | Atomic % |      |       |       |
|----------------|----------|------|-------|-------|
|                | Zn       | Zr   | Si    | O     |
| 5Zn/SBA-15     | 0.57     |      | 31.05 | 59.97 |
| 3Zr/SBA-15     |          | 0.35 | 31.50 | 58.90 |
| 5Zn-3Zr/SBA-15 | 0.69     | 0.30 | 29.77 | 58.24 |

## References

1. B. B. Corson, H. E. Jones, C. E. Welling, J. A. Hinckley and E. E. Stahly, *Ind. Eng. Chem.*, 1950, **42**, 359-373.
2. R. Ohnishi, T. Akimoto and K. Tanabe, *J. Chem. Soc., Chem. Commun.*, 1985, 1613-1614.
3. E. Suzuki, S. Idemura and Y. Ono, *Appl. Clay Sci.*, 1988, **3**, 123-134.
4. E. V. Makshina, W. Janssens, B. F. Sels and P. A. Jacobs, *Catal. Today*, 2012, **198**, 338-344.
5. T. De Baerdemaeker, M. Feyen, U. Müller, B. Yilmaz, F.-S. Xiao, W. Zhang, T. Yokoi, X. Bao, H. Gies and D. E. De Vos, *ACS Catal.*, 2015, **5**, 3393-3397.
6. O. V. Larina, P. I. Kyriienko and S. O. Soloviev, *Catal. Lett.*, 2015, **145**, 1162-1168.
7. R. A. L. Baylon, J. Sun and Y. Wang, *Catal. Today*, 2016, **259**, 446-452.
8. S. Da Ros, M. D. Jones, D. Mattia, J. C. Pinto, M. Schwaab, F. B. Noronha, S. A. Kondrat, T. C. Clarke and S. H. Taylor, *ChemCatChem*, 2016, **8**, 2376-2386.
9. J. V. Ochoa, C. Bandinelli, O. Vozniuk, A. Chieregato, A. Malmusi, C. Recchi and F. Cavani, *Green Chem.*, 2016, **18**, 1653-1663.
10. J. V. Ochoa, A. Malmusi, C. Recchi and F. Cavani, *ChemCatChem*, 2017, **9**, 2128-2135.
11. P. T. Patil, D. Liu, Y. Liu, J. Chang and A. Borgna, *Appl. Catal. A-Gen.*, 2017, **543**, 67-74.
12. M. M. Kurmach, O. V. Larina, P. I. Kyriienko, P. S. Yaremov, V. V. Trachevsky, O. V. Shvets and S. O. Soloviev, *ChemistrySelect*, 2018, **3**, 8539-8546.
13. L. H. Chagas, C. R. V. Matheus, P. C. Zonetti and L. G. Appel, *Molecular Catalysis*, 2018, **458**, 272-279.
14. A. Miyaji, M. Hiza, Y. Sekiguchi, S. Akiyama, A. Shiga and T. Baba, *J. Jpn. Pet. Inst.*, 2018, **61**, 171-181.
15. G. Pomalaza, G. Vofo, M. Capron and F. Dumeignil, *Green Chem.*, 2018, **20**, 3203-3209.
16. D. D. Dochain, A. Stýskalík and D. P. Debecker, *Catalysts*, 2019, **9**, 920.
17. G. M. Cabello González, R. Murciano, A. L. Villanueva Perales, A. Martínez, F. Vidal-Barrero and M. Campoy, *Appl. Catal. A-Gen.*, 2019, **570**, 96-106.
18. L. H. Chagas, P. C. Zonetti, C. R. V. Matheus, C. R. K. Rabello, O. C. Alves and L. G. Appel, *ChemCatChem*, 2019, **11**, 5625-5632.
19. G. M. Cabello González, P. Concepción, A. L. Villanueva Perales, A. Martínez, M. Campoy and F. Vidal-Barrero, *Fuel Process. Technol.*, 2019, **193**, 263-272.
20. Y. Zhao, S. Li, Z. Wang, S. Wang, S. Wang and X. Ma, *Chin. Chem. Lett.*, 2020, **31**, 535-538.
21. B. Szabó, G. Novodárszki, Z. Pászti, A. Domján, J. Valyon, J. Hancsók and R. Barthos, *ChemCatChem*, 2020, **12**, 5686-5696.
22. T. Miyazawa, Y. Tanabe, I. Nakamura, Y. Shinke, M. Hiza, Y.-K. Choe and T. Fujitani, *Catal. Sci. Technol.*, 2020, **10**, 7531-7541.
23. L. Qi, Y. Zhang, M. A. Conrad, C. K. Russell, J. Miller and A. T. Bell, *J. Am. Chem. Soc.*, 2020, **142**, 14674-



14687.

24. W. Dai, S. Zhang, Z. Yu, T. Yan, G. Wu, N. Guan and L. Li, *ACS Catal.*, 2017, **7**, 3703-3706.
25. K. Wang, L. Guo, W. Gao, B. Zhang, H. Zhao, J. Liang, N. Liu, Y. He, P. Zhang, G. Yang and N. Tsubaki, *ACS Sustain. Chem. Eng.*, 2021, **9**, 10569-10578.
26. A. A. Bojang and H.-S. Wu, *Catalysts*, 2022, **12**, 766.
27. K. Wang, X. Peng, C. Wang, W. Gao, N. Liu, X. Guo, Y. He, G. Yang, L. Jiang and N. Tsubaki, *Catal. Sci. Technol.*, 2022, **12**, 2210-2222.
28. H. Dai, T. Ye, K. Wang, M. Zhang, L.-M. Wu and G. Ouyang, *Catalysts*, 2022, **12**, 1147.
29. Z. Wang, S. Li, S. Wang, J. Liu, Y. Zhao and X. Ma, *Chin. J. Chem. Eng.*, 2022, **45**, 162-170.
30. N. Liu, L. Zhang, K. Wang, L. Shao, X. Guo, Y. He, Z. Wu, P. Zhan, G. Liu, J. Wu, G. Yang and N. Tsubaki, *Appl. Surf. Sci.*, 2022, **602**, 154299.
31. K. Wang, N. Liu, Q. Ma, Y. Kawabata, F. Wang, W. Gao, B. Zhang, X. Guo, Y. He, G. Yang and N. Tsubaki, *Catal. Today*, 2023, **411-412**, 113800.
